# Supplementary material
Source: PubMed Central journal article supplement (PMC4815092)
Supplement: supp_tpc.15.00508_TPC2015-00508-LSBR1_Supplemental_Material.pdf [file supp_tpc.15.00508_TPC2015-00508-LSBR1_Supplemental_Material.pdf]

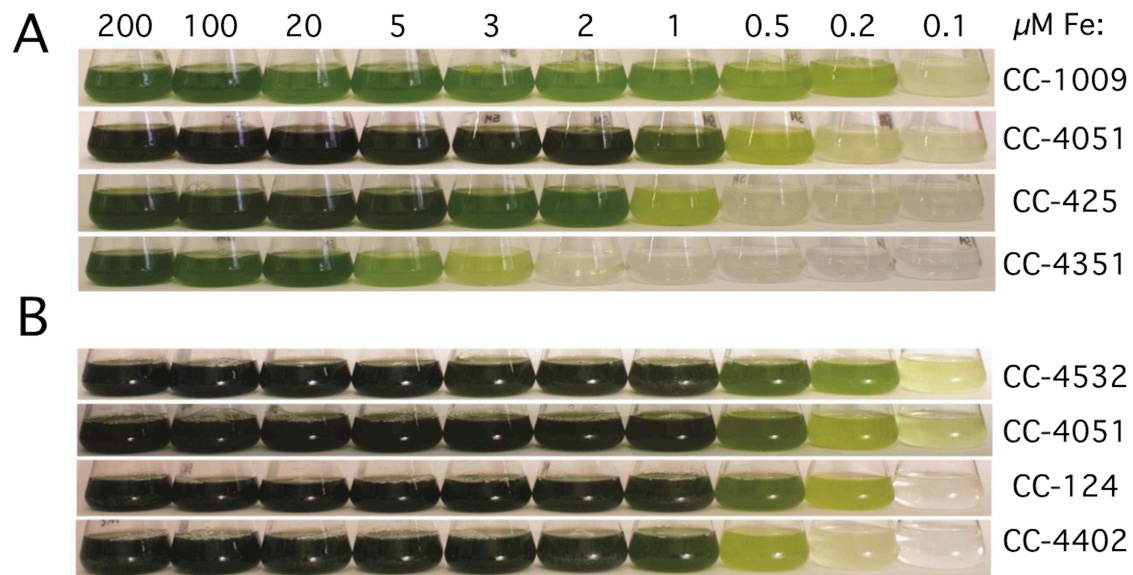

**Supplemental Figure 1. Growth Phenotype of Iron Limitation on Additional Wild Type Strains**

The indicated strains were inoculated to a density of  $1 \times 10^4$  cells / mL in 100 mL cultures of TAP medium containing iron concentrations ranging from 0.1 to 200  $\mu\text{M}$ .

(A) A first batch of cultures was photographed after 4 d of growth.

(B) A second batch of cultures was photographed after 5 d of growth.

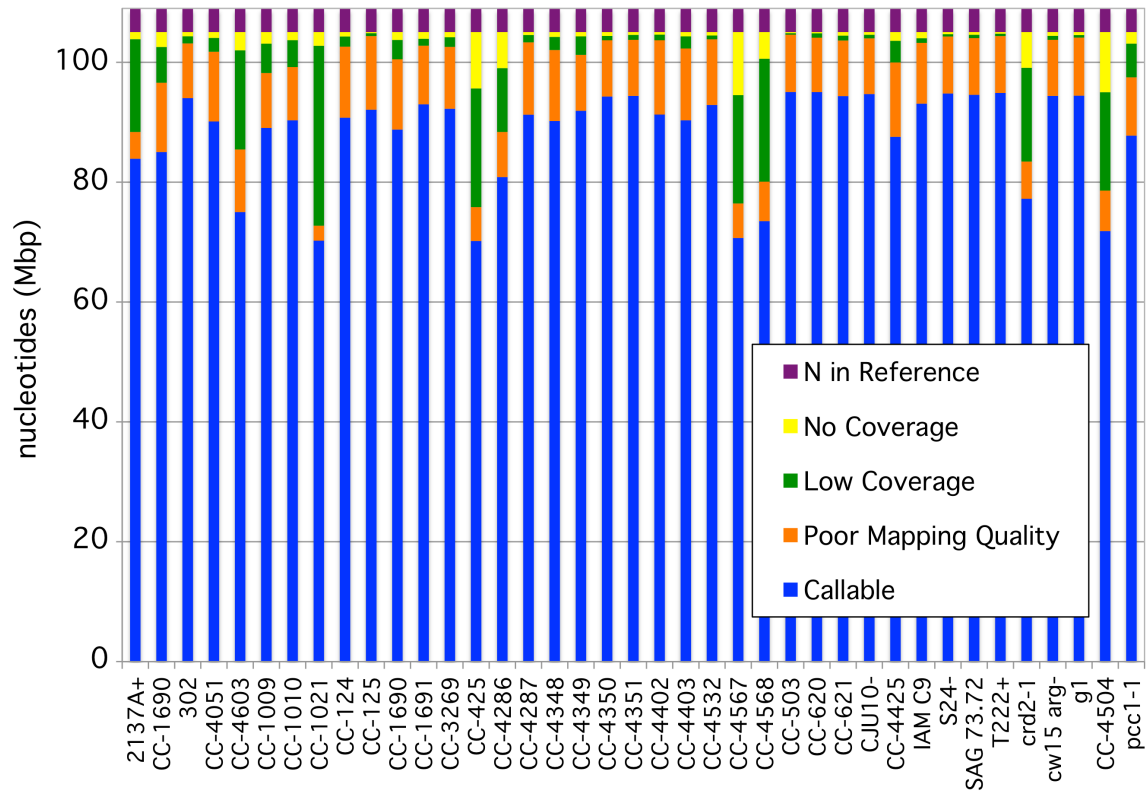

**Supplemental Figure 2. Callable Loci**

The quality of the base calls for each of the 109 million total nucleotides in the *C. reinhardtii* genome were categorized and plotted by GATK CallableLoci for each strain. Callable loci were those base calls that were based on four or more quality control-passing reads. The remaining reads were evaluated by the software to be uncallable due to insufficient coverage, low mapping quality, or a lack of sequence information in the reference genome.

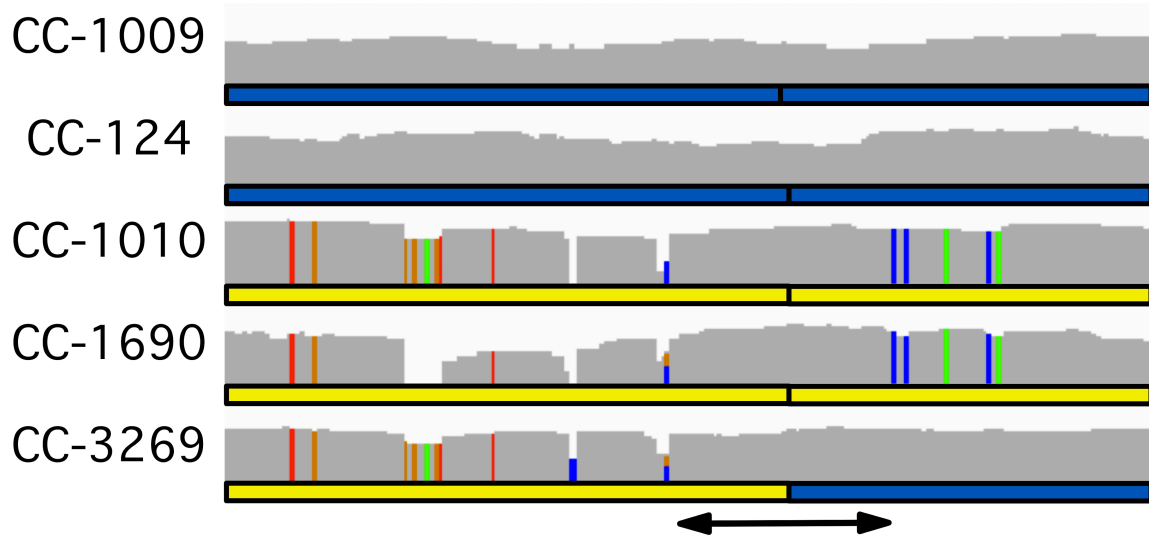

**Supplemental Figure 3. Evidence for Recombination Between Haplotypes**  
Nucleotides the same as reference (i.e. haplotype 1) are gray. SNVs relative to reference are color-coded: green = A, blue = C, brown = G, red = T. Regions that were identified as haplotype 2 based on their pattern of SNVs are indicated by a yellow box below the alignment. Haplotype 1 regions are indicated by a blue box. The double-headed arrow indicates the 52-bp region that is the likely site of a meiotic recombination event in the cross that produced CC-3269.

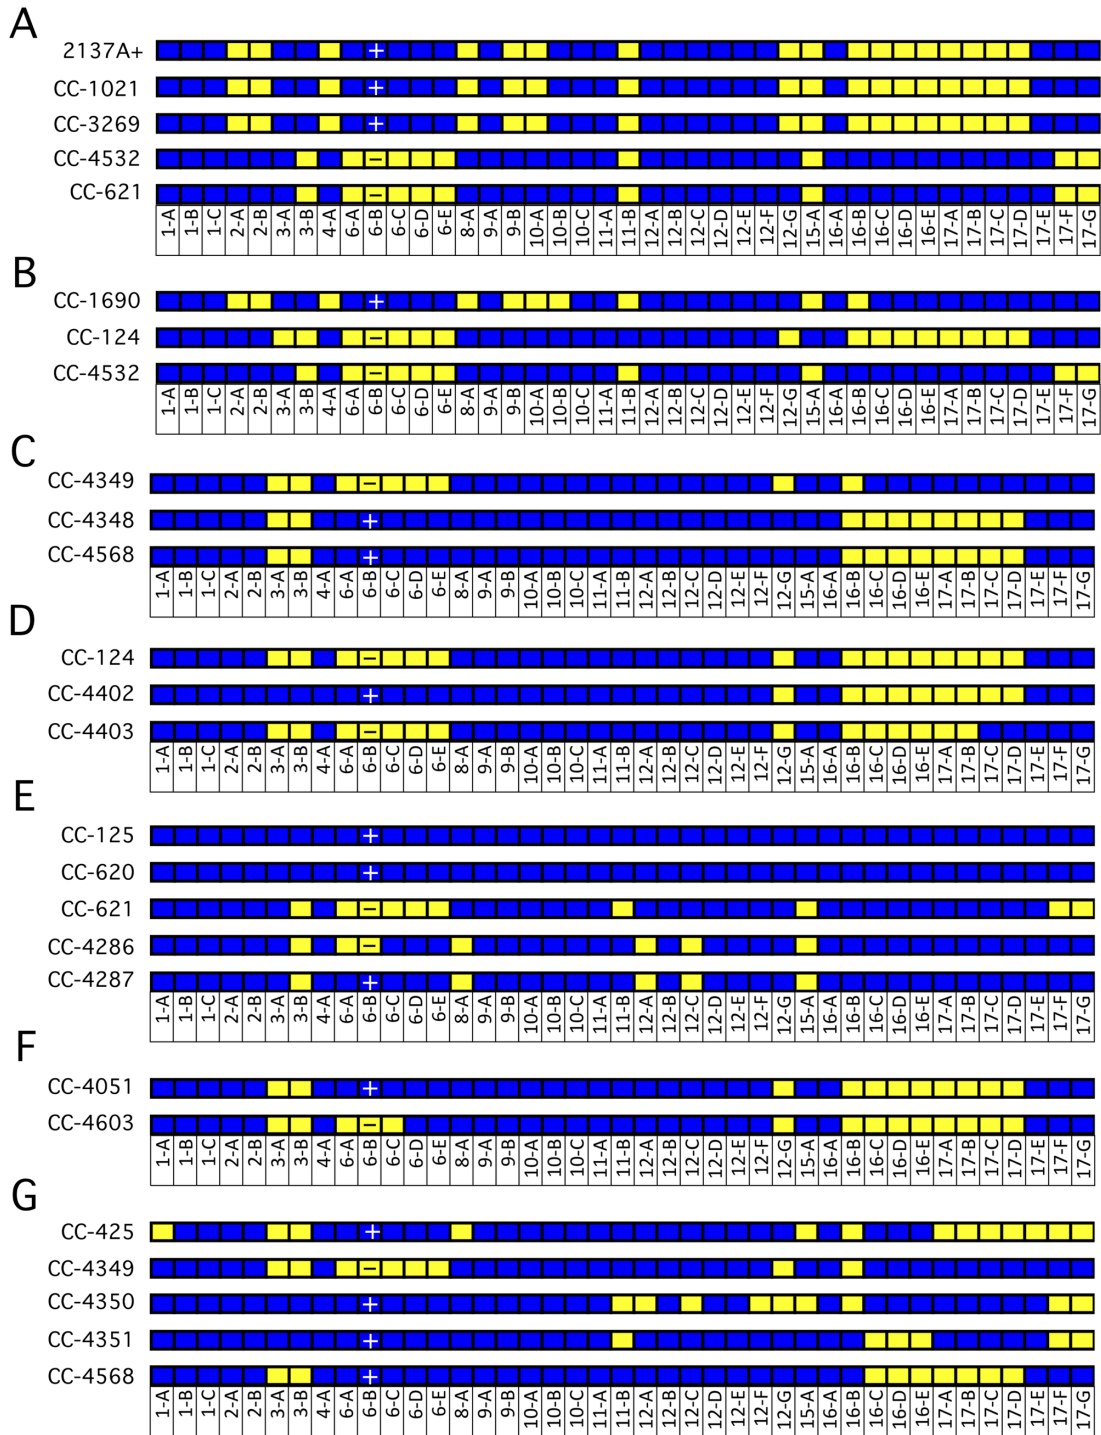

**Supplemental Figure 4. Comparison of Haplotype Patterns for Selected Strains**

Subsets of strains from Figure 5 are presented separately for easier comparison. Blue indicates haplotype 1, and yellow indicates haplotype 2. The mating locus is depicted with + or –.



**(A)** Strain 2137. Comparison of three examples of strain 2137 compared to CC-4532.

**(B)** CC-4532 cannot result from a cross of CC-124 and CC-1690.

**(C)** CC-4349 cannot be the parental strain of CC-4348.

**(D)** CC-124 backcrossed strains. CC-4402 and CC-4403 remain distinct from CC-124, despite 10 backcrosses to that strain.

**(E)** CC-4246 and CC4287. The parents of these two strains are not as reported, and remain to be identified.

**(F)** CC-4051 and CC-4603. These two strains are nearly isogenic. They differ in haplotype only in those blocks that include, or are adjacent to, the mating locus.

**(G)** *cw15* mutant strains. Five different *cw15* strains have dramatically different haplotypes.

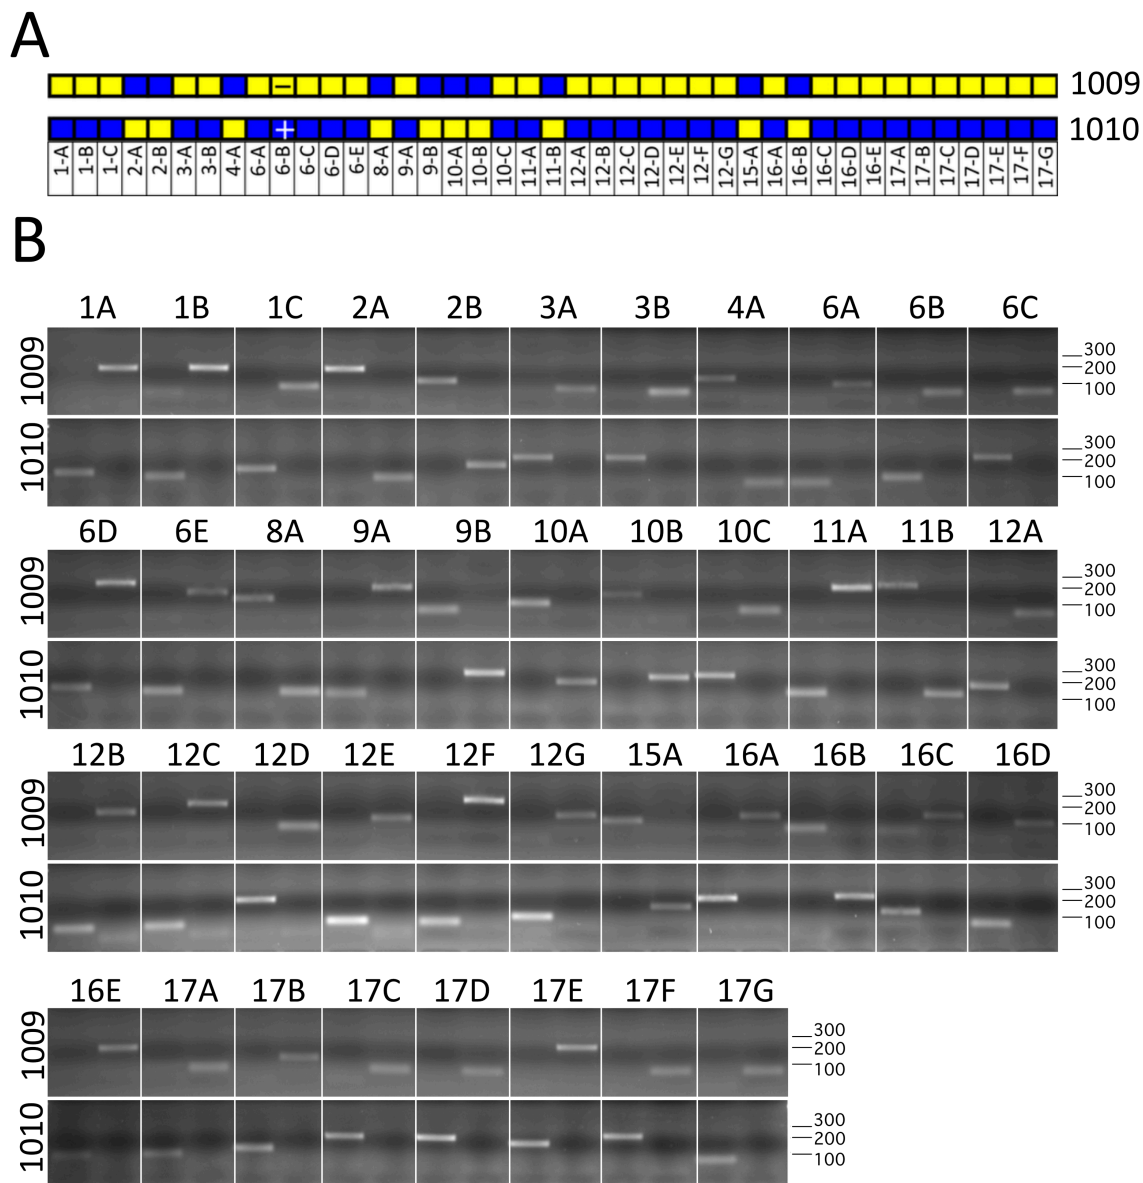

**Supplemental Figure 5. Allele-Specific Amplification to Identify Haplotype**

Allele-specific amplification primers were designed to amplify a product in one haplotype, but not the other, for all 41 defined haplotype blocks (Table 2). The sequences of all 82 primer pairs are included in Supplemental Dataset 6.

(A) Strains CC-1009 and CC-1010 have alternate haplotypes in all 41 regions.

(B) Haplotype scoring by analytical gel electrophoresis. DNA from CC-1009 and CC-1010 was subjected to PCR amplification with all 82 primer pairs, and scored by analytical gel electrophoresis. In each panel, the haplotype 1 specific product is on the left, and the haplotype 2 product is on the right. The position of 100, 200, and 300 bp markers is indicated to the right of each panel.

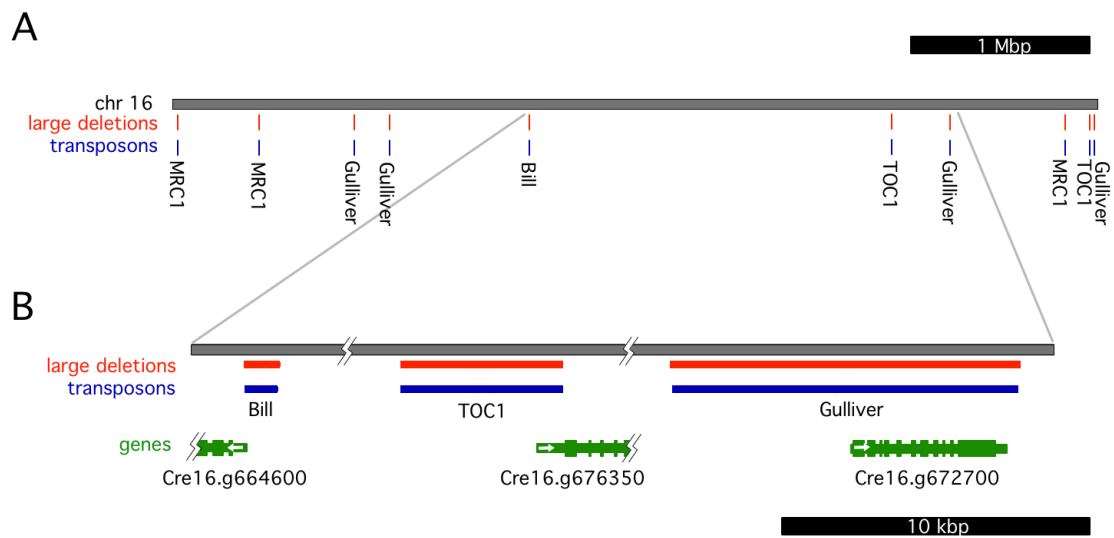

### Supplemental Figure 6. Examples of Transposon Position Jumping in Chromosome 16

(A) Transposons in Chromosome 16. The position of 10 transposons identified in the reference sequence in chromosome 16 are depicted in blue. Large deletions (greater than 40 bp) identified by sequencing the standard laboratory strains are depicted in red. The scale bar indicates 1 Mbp.

(B) An expanded view of three transposons. The scale bar indicates 10 kbp. An additional track in green indicates the loci of genes likely to be affected by these transposons.

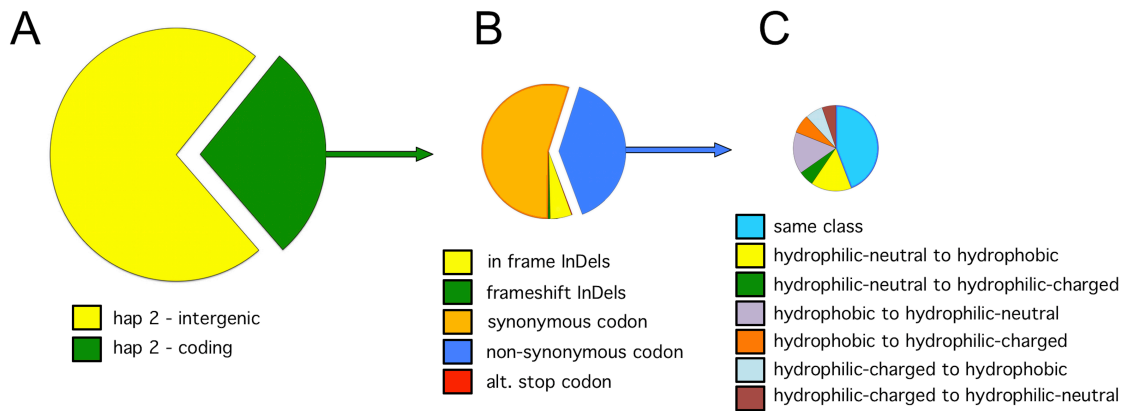

### Supplemental Figure 7. Predicted Effects of Haplotype 2 Variants on Gene Models

The likely effect of the haplotype 2 SNVs and small InDels on the gene models was predicted computationally. Each class of variant is presented in a proportionately size pie chart.

**(A)** All haplotype 2 variants. 164,606 out of 592,554 haplotype 2 small variants were localized within coding regions.

**(B)** Coding region-localized variants. These were classified based on their predicted effect on the relevant gene model.

**(C)** Non-synonymous codon changes. The 64,685 non-synonymous codon changes are further subdivided based on the predicted change to the encoded amino acid.

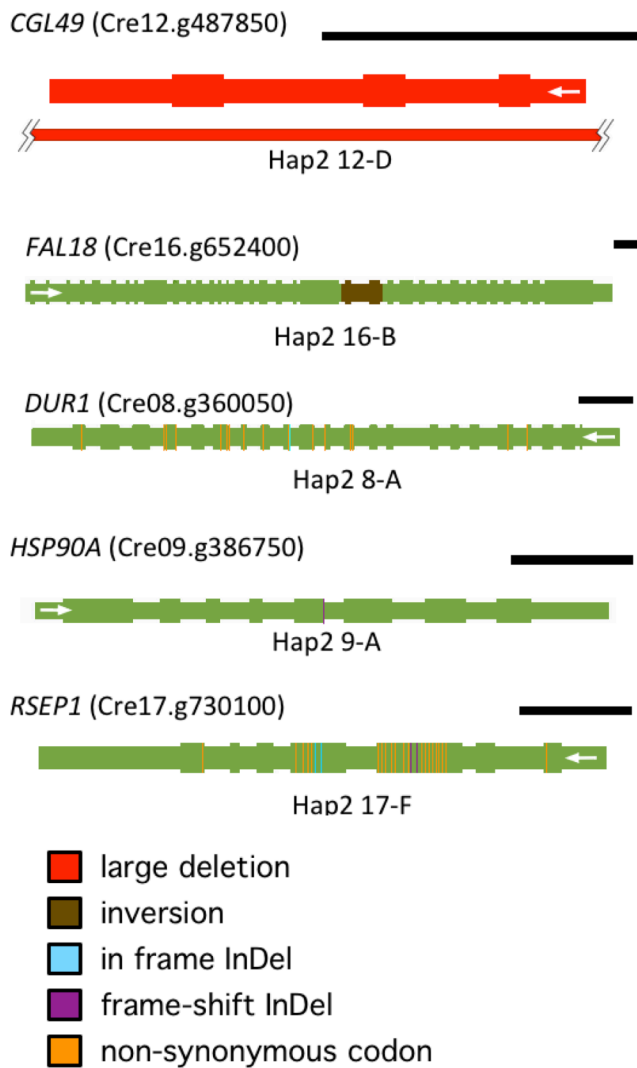

**Supplemental Figure 8. Variants in Genes Attributable to Haplotype 2**  
The predicted effects of haplotype 2 variants on gene models are color coded according to the legend, and a black scale bar representing 1 kbp of DNA is included for each.

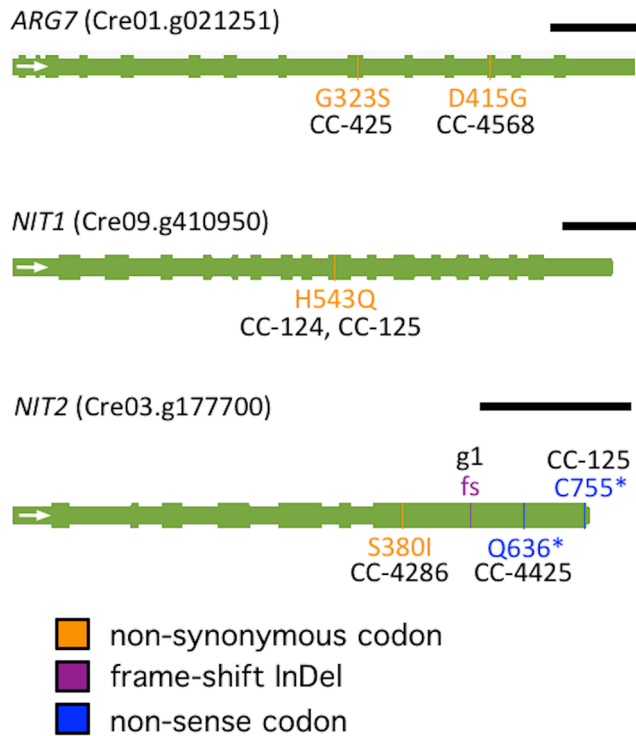

### Supplemental Figure 9. Laboratory-Originated Mutations in Commonly Studied Genes

Presented here are mutations that we identified in three commonly studied genes. A black scale bar indicating 1 kbp of DNA is included for each gene. Mutations are color coded according to the legend, and an example strain that carries the mutation is indicated for each variant.

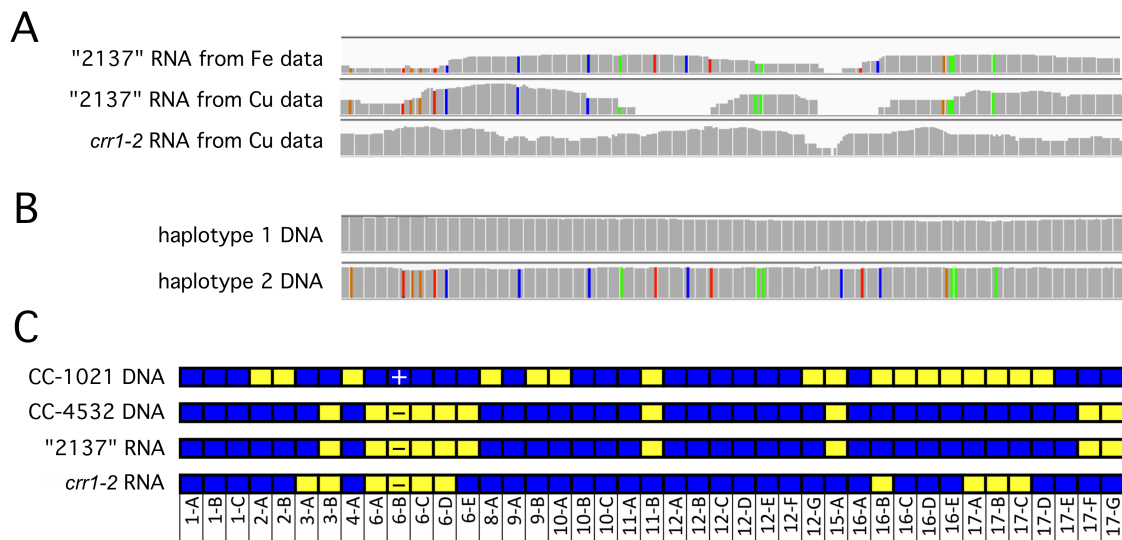

### Supplemental Figure 10. Determining Haplotype from RNA-seq Data Identifies Mislabeled "2137" Strain

Reads from RNA-seq experiments performed by this group in 2007 were realigned to the reference genome in order to identify the haplotypes of the strains used in those experiments.

(A) A representative region of chromosome 17 from 4,359,642 to 4,359,871 that has a distinctive pattern of SNVs between the two haplotypes. The coverage of RNA-seq reads to the *SDR28* locus is shown for the indicated experiments.

Nucleotides the same as reference (i.e. haplotype 1) are gray. SNVs are color-coded: green = A, blue = C, brown = G, red = T. "2137" RNA from Fe data indicates reads from an RNA-seq study in a strain that was believed to be 2137 that was grown in limiting iron (Urzica et al., 2012). "2137" RNA from Cu data indicates reads from an independent RNA-seq study performed with the same strain grown in limiting copper (Castruita et al., 2011). *crr1-2* RNA from Cu data indicates reads from the same copper study performed in mutant strain *crr1-2*.

(B) For comparison, genomic data from the current study is included to demonstrate the pattern of SNVs in the two haplotypes at this locus. Haplotype 1 reads are from CC-1010 and haplotype 2 reads from CC-1009.

(C) Using this approach, the "2137" and *crr1-2* data were scored for haplotype in each block. The resulting haplotypes from the RNA-seq data are compared to the indicated DNA haplotypes.

### Transversions

|        |        |
|--------|--------|
| A -> C | 29,483 |
| G -> T | 29,715 |
| A -> T | 17,238 |
| T -> A | 17,468 |
| C -> A | 29,294 |
| T -> G | 29,098 |
| C -> G | 32,082 |
| G -> C | 31,725 |

### Transitions

|        |        |
|--------|--------|
| A -> G | 77,280 |
| C -> T | 77,003 |
| G -> A | 76,862 |
| T -> C | 77,392 |

### Supplemental Table 1. Transversions and Transitions for all SNVs

The 524,640 SNVs that were identified in this study were subdivided into each of the possible transversions and transitions.





| Gene ID       | Gene Name             | Gene Description                                                           | Haplotype 2 Variant                                                                                                                           |
|---------------|-----------------------|----------------------------------------------------------------------------|-----------------------------------------------------------------------------------------------------------------------------------------------|
| Cre01.g009650 | BUG25                 | Basal body protein and putative AP2 domain transcription factor            | 9112 bp deletion removes all of exon 1 and part of exon 2 in BUG25. 1 other gene is completely removed and 1 other gene is partially removed. |
| Cre01.g009800 | FAP289                | Flagellar Associated Protein, coiled-coil                                  | 79,864 bp deletion completely removes FAP289 and 6 other genes, and partially removes 2 other genes.                                          |
| Cre01.g012100 | ARS4                  | Arylsulfatase                                                              | 77 bp deletion removes part of exon 6 in ARS4. Also, 1 frame shift InDel, 1 in-frame InDel, and 17 nonsynonymous codons.                      |
| Cre01.g012800 | FAP230                | Flagellar Associated Protein                                               | 15,260 bp deletion causes complete loss of FAP230 and partial loss of 2 other genes                                                           |
| Cre01.g013300 | DEG10                 | DegP-type protease                                                         | 1 in frame InDel, 11 non-synonymous codons                                                                                                    |
| Cre01.g016500 | DLD2                  | Dihydroliipoamide dehydrogenase                                            | 1 in frame InDel, 21 non-synonymous codons                                                                                                    |
| Cre01.g044100 | AMYB3                 | Beta-amylase                                                               | 10 non-synonymous codons                                                                                                                      |
| Cre02.g113850 | PBGD2 / HEM3          | Porphobilinogen deaminase                                                  | 2 frame shift InDels, 2 non-synonymous codons                                                                                                 |
| Cre02.g118950 | PRPS17                | Plastid ribosomal protein S17                                              | 1 in frame InDel                                                                                                                              |
| Cre06.g252200 | TOC34                 | Translocon at the outer envelope membrane of chloroplasts. 75 kD           | 14 non-synonymous codons                                                                                                                      |
| Cre06.g255450 | MAT3                  | Retinoblastoma protein                                                     | 6 non-synonymous codons                                                                                                                       |
| Cre06.g260450 | LCI20                 | 2-oxoglutarate/malate translocator                                         | 1 in frame InDel                                                                                                                              |
| Cre08.g360050 | DUR1                  | Urea carboxylase/allophanate hydrolase                                     | 1 in frame InDel, 16 non-synonymous codons                                                                                                    |
| Cre08.g360100 | DUR2                  | Allophanate hydrolase                                                      | 7 non-synonymous codons                                                                                                                       |
| Cre09.g386750 | HSP90A                | Heat shock protein 90A                                                     | 1 frame shift                                                                                                                                 |
| Cre09.g394200 | FAP102                | Flagellar Associated Protein                                               | Insertion in 5th exon of FAP102.                                                                                                              |
| Cre09.g395950 | AOX1                  | Alternative oxidase                                                        | 1 in frame InDel, 2 non-synonymous codons                                                                                                     |
| Cre09.g396650 | PAT2                  | Phosphate acetyltransferase                                                | 1626 bp deletion removes exon 17. A second 105 bp deletion removes part of exon 18.                                                           |
| Cre09.g396700 | ACK1                  | Acetate kinase                                                             | 9 non-synonymous codons                                                                                                                       |
| Cre09.g399400 | FAP199 / TGL15        | Triacylglycerol lipase                                                     | 265 bp deletion removes most of exon 1.                                                                                                       |
| Cre09.g403900 | FAP294                | Flagellar Associated Protein                                               | 12,661 bp deletion removes FAP294 and 2 other genes, and partially removes 2 more genes.                                                      |
| Cre10.g419050 | ATP1B                 | Mitochondrial F1F0 ATP synthase, alpha subunit                             | 3 in frame InDels, 3 non-synonymous codons                                                                                                    |
| Cre10.g465550 | CLPD1                 | CipD chaperone, Hsp100 family                                              | 1 in frame InDel, 3 non-synonymous codons                                                                                                     |
| Cre10.g465900 | CDKA1                 | Cyclin dependent protein kinase                                            | 21,642 bp deletion removes CDKA1 and 5 other genes, and partially removes 1 other gene.                                                       |
| Cre12.g487850 | CGL49 / ARL11         | ARF/SAR superfamily small monomeric GTP binding protein                    | 27,736 bp deletion removes all of CGL49 and 3 other genes, and partially removes 1 other gene.                                                |
| Cre12.g488500 | ARC6                  | unannotated in Phytozome10                                                 | 12 non-synonymous codons                                                                                                                      |
| Cre12.g490700 | MIN1                  | Mini-eyespot protein                                                       | 1 in frame InDel, 3 non-synonymous codons                                                                                                     |
| Cre12.g495100 | PSR1                  | Phosphorus starvation response protein, Myb-like transcriptional regulator | 1 in frame InDel, 4 non-synonymous codons                                                                                                     |
| Cre12.g547100 | CGL2 / SMM43          | S-adenosyl-L-methionine-dependent methyltransferase                        | 23,595 bp deletion removes all of CGL2 and 4 other genes, and part of 1 other gene.                                                           |
| Cre12.g554250 | LPB1                  | Low Photochemical Bleaching protein                                        | 2 in frame InDels, 7 non-synonymous codons                                                                                                    |
| Cre12.g554300 | NSS6                  | Sodium:solute symporter                                                    | 5 in frame InDels, 24 non-synonymous codons                                                                                                   |
| Cre16.g652400 | FAL18                 | Similar to Flagellar Associated Protein FAP183                             | A 579 bp inversion reverses the orientation of exon 22. A second 762 bp inversion reverses the orientation of exon 23.                        |
| Cre16.g654150 | FAP63                 | Flagellar Associated Protein                                               | 17,916 bp deletion removes 5' UTR of FAP63 and completely removes 4 other genes.                                                              |
| Cre17.g698850 | ISA2                  | Isoamylase-type starch debranching enzyme                                  | 19,265 bp inversion disrupts ISA2 and 1 other gene. 2 other genes in reverse orientation. Also, 1 in frame InDel, 9 non-synonymous codons.    |
| Cre17.g699500 | TTLL9 / FAP267 / TTL8 | Tubulin tyrosine ligase                                                    | 2412 bp inversion disrupts TTLL9.                                                                                                             |
| Cre17.g713200 | OMT2                  | Chloroplast oxoglutarate-malate translocator                               | 17,076 bp deletion removes part of OMT2 and completely removes 2 other genes.                                                                 |
| Cre17.g720400 | HMA1                  | Heavy metal transporting ATPase                                            | 5 in frame InDels, 24 non-synonymous codons                                                                                                   |
| Cre17.g728900 | FSA1 / TAL3           | Transaldolase                                                              | 22,593 bp deletion completely removes FSA1 and 1 other gene, and partially removes 2 other genes.                                             |
| Cre17.g730100 | RSEP1 / RSE1          | Intramembrane metalloprotease                                              | 2 frame shifts, 2 in frame InDels, 21 non-synonymous codons                                                                                   |
| Cre17.g739650 | MFT1 / MAE1           | MATE efflux family protein                                                 | 4 in frame InDels, 28 non-synonymous codons                                                                                                   |

**Supplemental Table 3. Examples of Genes with Predicted Haplotype 2-Specific Variants**

| Gene ID       | Gene Name | GO Identifiers                                 | GO Names                                                                      |
|---------------|-----------|------------------------------------------------|-------------------------------------------------------------------------------|
| Cre01.g053450 | CYA1      | GO:0007154, GO:0007165, GO:0023052, GO:0044700 | cell communication, signal transduction, signaling, single organism signaling |
| Cre02.g100500 | CYG22     | GO:0007154, GO:0007165, GO:0023052, GO:0044700 | cell communication, signal transduction, signaling, single organism signaling |
| Cre02.g103200 |           | GO:0007154, GO:0007165, GO:0023052, GO:0044700 | cell communication, signal transduction, signaling, single organism signaling |
| Cre04.g217450 |           | GO:0007154, GO:0007165, GO:0023052, GO:0044700 | cell communication, signal transduction, signaling, single organism signaling |
| Cre05.g237800 | CYG64     | GO:0007154, GO:0007165, GO:0023052, GO:0044700 | cell communication, signal transduction, signaling, single organism signaling |
| Cre06.g290200 | CYG39     | GO:0007154, GO:0007165, GO:0023052, GO:0044700 | cell communication, signal transduction, signaling, single organism signaling |
| Cre07.g318551 | CYA8      | GO:0007154, GO:0007165, GO:0023052, GO:0044700 | cell communication, signal transduction, signaling, single organism signaling |
| Cre07.g342350 |           | GO:0007154, GO:0007165, GO:0023052, GO:0044700 | cell communication, signal transduction, signaling, single organism signaling |
| Cre08.g362100 |           | GO:0007154, GO:0007165, GO:0023052, GO:0044700 | cell communication, signal transduction, signaling, single organism signaling |
| Cre08.g373200 |           | GO:0007154, GO:0007165, GO:0023052, GO:0044700 | cell communication, signal transduction, signaling, single organism signaling |
| Cre09.g386900 |           | GO:0007154, GO:0007165, GO:0023052, GO:0044700 | cell communication, signal transduction, signaling, single organism signaling |
| Cre10.g429750 |           | GO:0007154, GO:0007165, GO:0023052, GO:0044700 | cell communication, signal transduction, signaling, single organism signaling |
| Cre11.g467651 |           | GO:0007154, GO:0007165, GO:0023052, GO:0044700 | cell communication, signal transduction, signaling, single organism signaling |
| Cre13.g567800 |           | GO:0007154, GO:0007165, GO:0023052, GO:0044700 | cell communication, signal transduction, signaling, single organism signaling |
| Cre13.g605100 |           | GO:0007154, GO:0007165, GO:0023052, GO:0044700 | cell communication, signal transduction, signaling, single organism signaling |

**Supplemental Table 4. Enrichment of Gene Ontology Terms in Laboratory-Originated Loss-of-Function Mutations**

| Original Strain | Sequence-Verified Clone |
|-----------------|-------------------------|
| CC-124          | CC-5074                 |
| CC-125          | CC-5075                 |
| CC-425          | CC-5076                 |
| CC-503          | CC-5077                 |
| CC-620          | CC-5078                 |
| CC-621          | CC-5079                 |
| CC-1009         | CC-5080                 |
| CC-1010         | CC-5081                 |
| CC-1690         | CC-5082                 |
| CC-1691         | CC-5083                 |
| CC-2290         | CC-5084                 |
| CC-3269         | CC-5085                 |
| CC-4051         | CC-5086                 |
| CC-4286         | CC-5087                 |
| CC-4287         | CC-5088                 |
| CC-4348         | CC-5089                 |
| CC-4350         | CC-5090                 |
| CC-4351         | CC-5091                 |
| CC-4402         | CC-5092                 |
| CC-4403         | CC-5093                 |
| CC-4425         | CC-5094                 |
| CC-4504         | CC-5095                 |
| <i>pcc1-1</i>   | CC-5096                 |
| CC-4603         | CC-5097                 |
| IAM C-9         | CC-5098                 |
| SAG 73.72       | CC-5099                 |
| S24-            | CC-5100                 |
| T222+           | CC-5101                 |
| g1              | CC-5102                 |
| CJU10-          | CC-5103                 |

**Supplemental Table 5. Sequence-Verified Clones Available from the Chlamydomonas Resource Center**
